# Supplementary material for: Physical activity, body mass index and heart rate variability-based stress and recovery in 16 275 Finnish employees: a cross-sectional study
Source: Springer Nature journal article supplement (doi:10.1186/s12889-016-3391-4), 2016-08-02

# LIFESTYLE ASSESSMENT

|                                                                                                                                                                  |  |  |  |                                                                                                                  |  |
|------------------------------------------------------------------------------------------------------------------------------------------------------------------|--|--|--|------------------------------------------------------------------------------------------------------------------|--|
| Person: Ellie Example<br>Age 50 Activity Class 6.0 (Good)<br>Height (cm) 170 Resting heart rate 35<br>Weight (kg) 62 Max. heart rate 189<br>Body Mass Index 21.5 |  |  |  | Measurement:<br>Start time Mon 01.10.2015 06:00<br>Duration 24h 0min<br>Heart rate (low/avg./high) 39 / 62 / 126 |  |
|------------------------------------------------------------------------------------------------------------------------------------------------------------------|--|--|--|------------------------------------------------------------------------------------------------------------------|--|

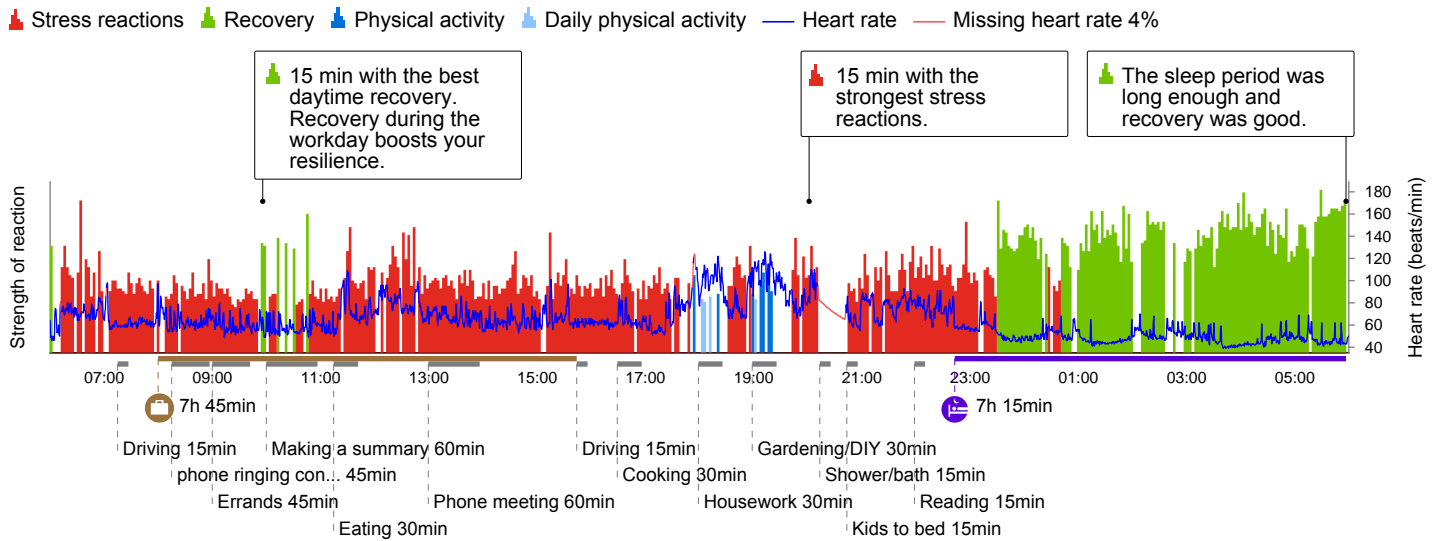

## STRESS AND RECOVERY

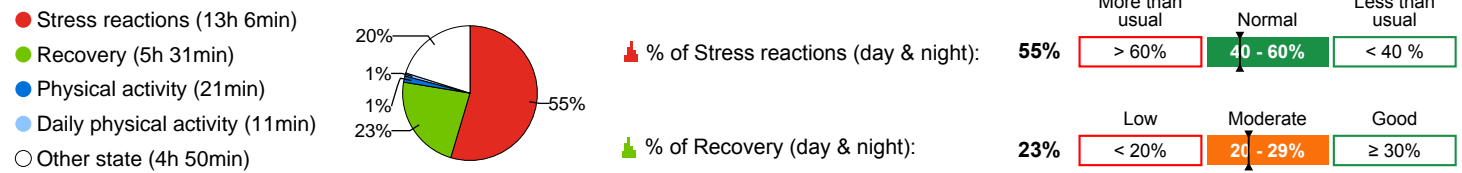

## WORK

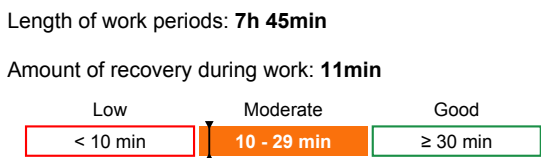

## SLEEP

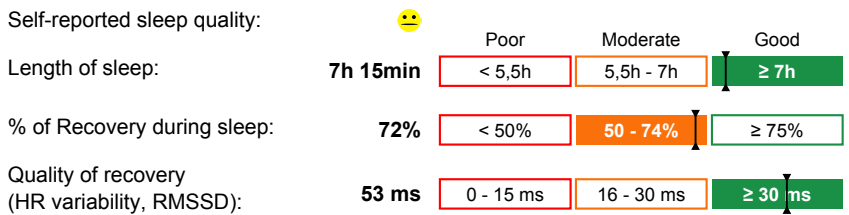

## PHYSICAL ACTIVITY

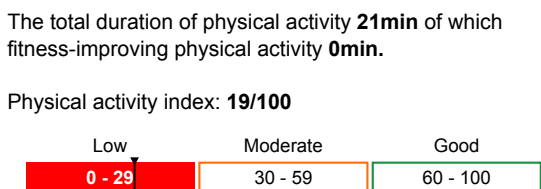

## ENERGY EXPENDITURE

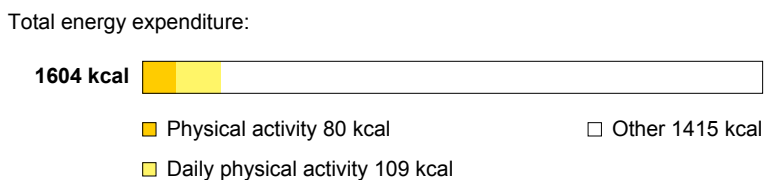

Supplement: MOESM4 [file 10553500]
